# Supplementary material for: Molecular layer deposition of photoactive metal-naphthalene hybrid thin films
Source: Royal Society of Chemistry journal article supplement (doi:10.1039/d1dt02201f), 2021-01-01
Supplement: d1dt02201f1.pdf [file d1dt02201f1.pdf]

## Electronic Supplementary Information (ESI)

### Molecular layer deposition of photoactive metal-naphthalene hybrid thin films

Melania Rogowska,<sup>\*a</sup> Per-Anders Hansen,<sup>a</sup> Henrik Hovde Sønsteby,<sup>a</sup> Joanna Dziadkowiec,<sup>b</sup> Håkon Valen<sup>c</sup> and Ola Nilsen<sup>a</sup>

<sup>a</sup>Centre for Materials Science and Nanotechnology, Department of Chemistry, University of Oslo, 0315 Oslo, Norway. <sup>b</sup>The NJORD Centre, Department of Physics, University of Oslo, 0371 Oslo, Norway. <sup>c</sup>Nordic Institute of Dental Materials, 0855 Oslo, Norway.

#### 1. X-ray reflectivity (XRR)

The XRR fitting process was performed using X'Pert Reflectivity software. The sample model used for fitting consisted of three layers: Si substrate, SiO<sub>2</sub> native oxide layer and deposited film layer. Each new system i.e. Ti-, Y-, Zr-, and Hf-NDC was created and added to the material database. The fitted parameters for each layer were thickness, density and roughness. The instrument parameters such as substrate length (10 mm) and beam width (0.1 mm) were also added to the fitting process.

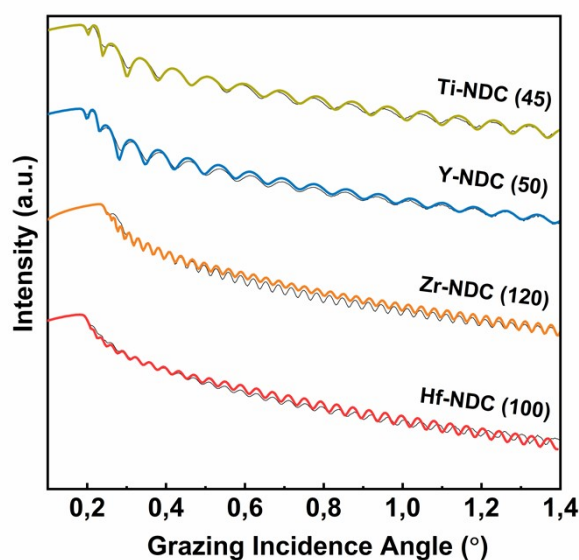

**Fig. S1** XRR patterns for the as-deposited Ti-, Y-, Zr-, and Hf-NDC films with different total film thickness (nm). Black lines: measured data, colour lines: fitted patterns.

## 2. Fourier transform infrared spectroscopy (FTIR)

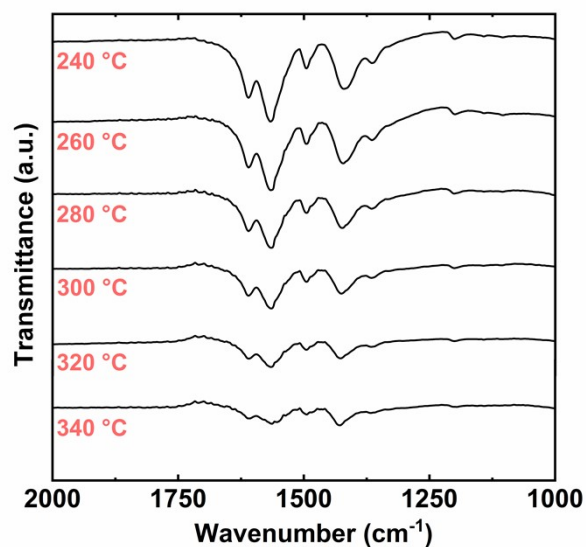

**Fig. S2** FTIR reflection spectra of Y-NDC films deposited at different temperatures.

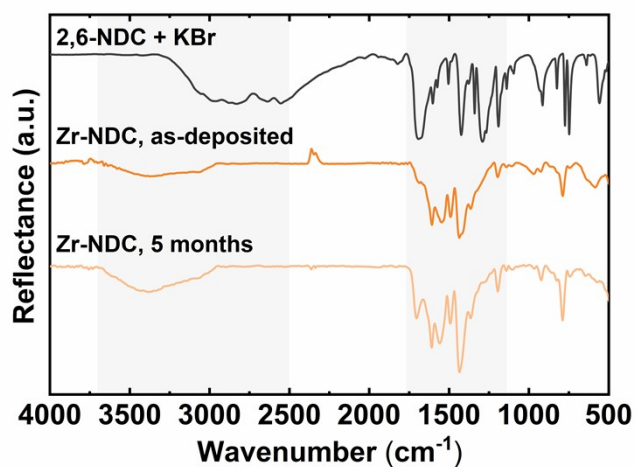

**Fig. S3** FTIR reflection spectra of as-deposited Zr-NDC film and the same sample after 5 months of air-storage.

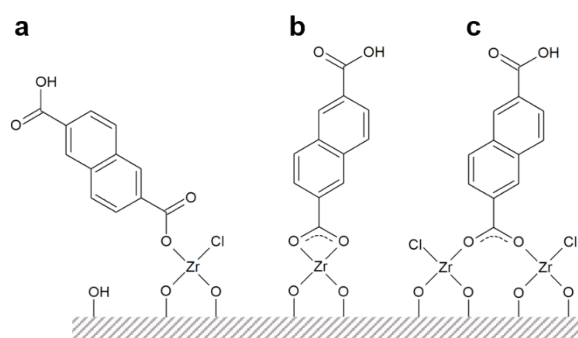

**Fig. S4** Possible coordination modes of 2,6-NDC molecule to zirconium: **(a)** monodentate complex, **(b)** bidentate complex, and **(c)** bridging complex.

### 3. X-ray photoelectron spectroscopy (XPS)

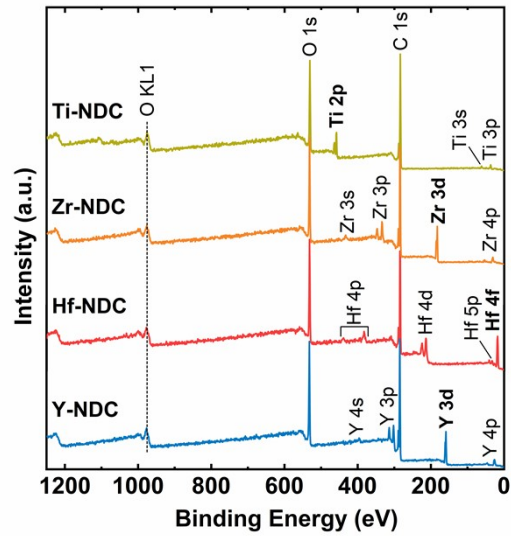

Fig. S5 XPS survey spectra for Ti-NDC, Zr-NDC, Hf-NDC and Y-NDC films.

### 4. UV-Vis and PL spectroscopy

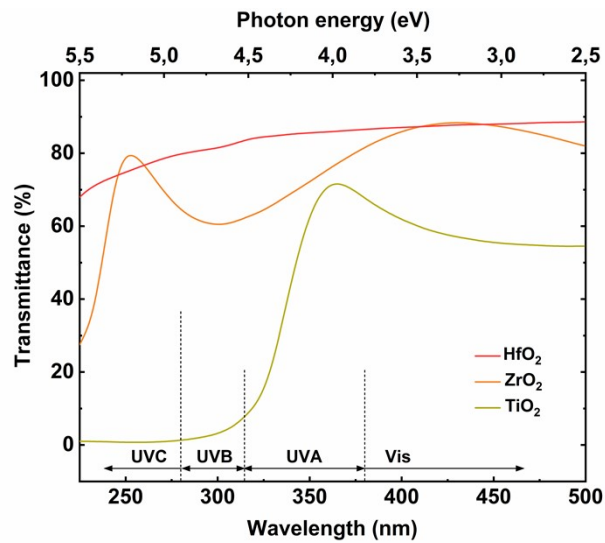

Fig. S6 UV-Vis transmission spectra for three deposited metal oxide thin films: TiO<sub>2</sub> (60 nm), ZrO<sub>2</sub> (101 nm) and HfO<sub>2</sub> (50 nm). The deposition parameters for HfO<sub>2</sub>, ZrO<sub>2</sub> and TiO<sub>2</sub> were respectively: 0.4/0.5/0.5/0.5 for HfCl<sub>4</sub>/purge/H<sub>2</sub>O/purge at 300 °C; 3/6/5/6 for ZrCl<sub>4</sub>/purge/H<sub>2</sub>O/purge at 265 °C and 1/2/1/2 s for TiCl<sub>4</sub>/purge/H<sub>2</sub>O/purge at 300 °C.

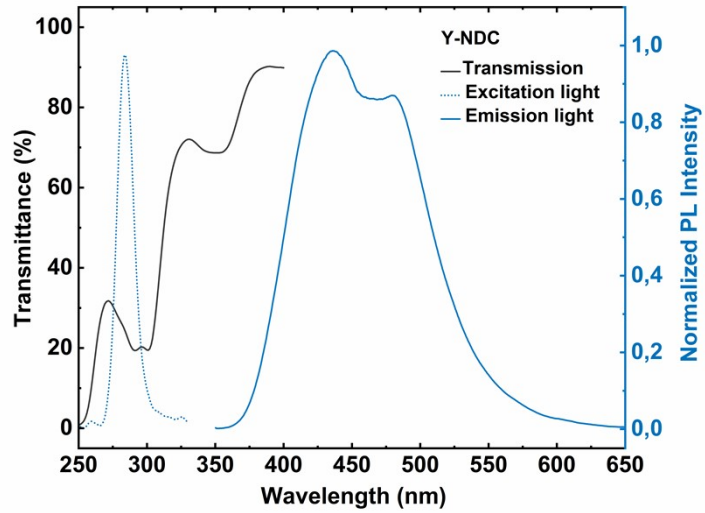

**Fig. S7** The optical transmission and photoluminescence emission of the Y-NDC film (99 nm).

### 5. Fourier transform infrared spectroscopy (FTIR) after UV irradiation

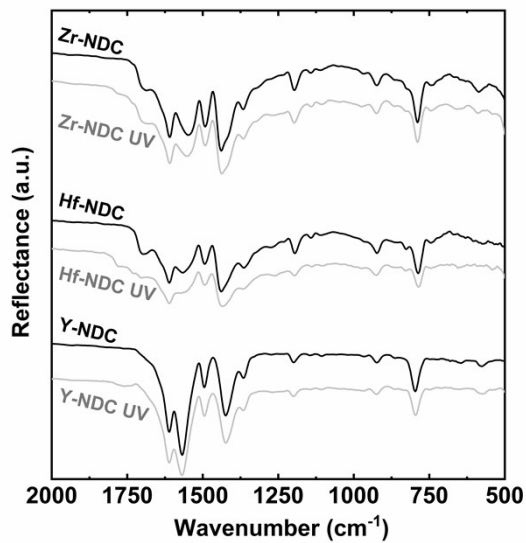

**Fig. S8** FTIR reflection spectra of Zr-NDC, Hf-NDC and Y-NDC thin films before and after 3 hours of irradiation by 365 nm UV light. The photon flux was 2100 mW/cm<sup>2</sup> at a working distance of ~5 mm. Black lines: as-deposited films, grey lines: films after UV irradiation.

## 6. X-ray diffraction (XRD)

X-ray diffraction measurements were performed using Bruker AXS D8-A25 diffractometer equipped with a LynxEye strip detector and Ge (111) focusing monochromator, providing  $\text{CuK}\alpha$  radiation.

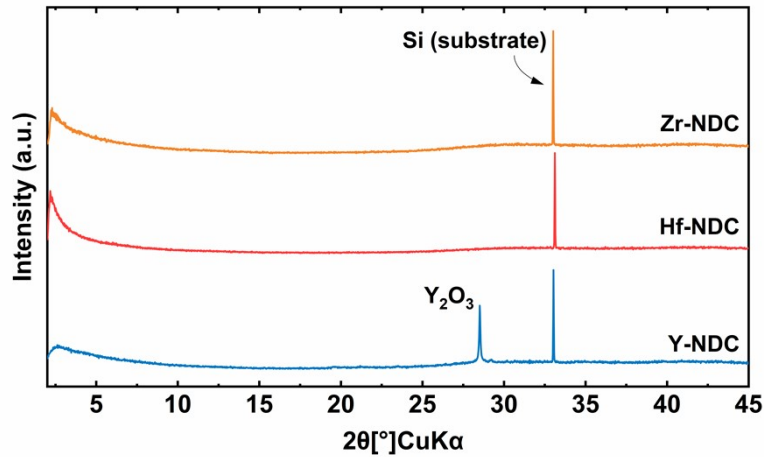

**Fig. S9** X-ray diffractograms for the as-deposited Zr-NDC, Hf-NDC and Y-NDC samples.

## 7. Atomic force microscopy (AFM)

AFM measurements for Ti-NDC and Zr-NDC films were performed in noncontact mode with a scan size of  $10 \times 10 \mu\text{m}^2$  and 256 px resolution using Park XE70 instrument from Park Systems. To scan Hf-NDC and Y-NDC films, we used JPK NanoWizard 4 Bioscience AFM in the Quantitative Imaging (QI™)-mode, with a ContAl-G cantilever (NanoSensors,  $k = 0.2 \text{ N/m}$  and  $l = 450 \mu\text{m}$ ). The off-resonance QI™ mode (with tip-sample vertical interaction force measured and recorded at each scanned pixel) was used to obtain surface topography and surface adhesion maps with a scan size of  $10 \times 10 \mu\text{m}^2$  and 256 px resolution. Adhesion was probed in air at ambient conditions in a temperature-controlled box ( $25 \pm 0.5 \text{ }^\circ\text{C}$ ). The RMS roughness was calculated as an average value from three line profiles picked in three different regions on each scanned sample. The AFM images were processed using Gwyddion 2.56 software.

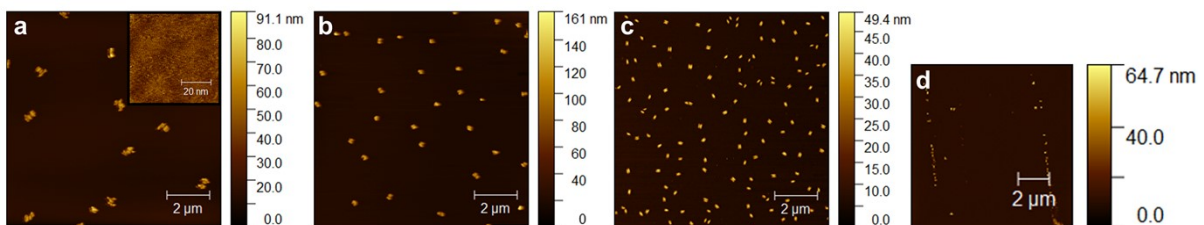

**Fig. S10** Surface topography as measured by AFM for (a) Zr-NDC (110 nm), (b) Ti-NDC (99 nm), (c) Hf-NDC (93 nm) and (d) Y-NDC (102 nm). Zoomed-in image on (a) showing only flat surface without islands.

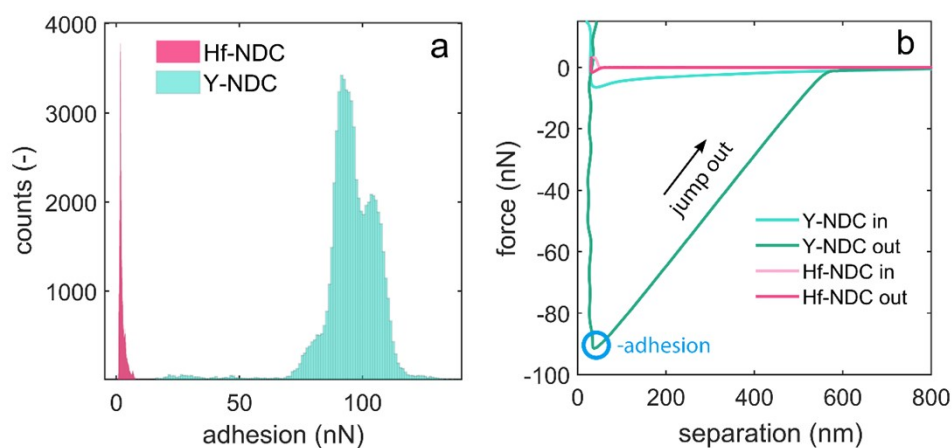

**Fig. S11** Adhesion measured between an AFM tip and Hf-NDC or Y-NDC samples in air at ambient conditions: **(a)** histograms comparing the distribution of adhesion values for two films extracted from the measured adhesion maps with vertical force-distance curves measured at each scanned pixel (scan size  $10 \times 10 \mu\text{m}^2$  and 256 px-resolution); **(b)** representative force-separation distance curves measured on approach (in) and on retraction (out). Adhesion shown in panel **(a)** was determined as the absolute minimum measured force before an adhesive jump-out event. The measured adhesion force for Hf-NDC was  $2.3 \pm 0.1$  nN and for Y-NDC  $95.1 \pm 4.1$  nN.

## 8. Stability test

**Table S1** Film thickness before and after 24 hours of exposure to DI water as measured by SE

| Sample | Initial thickness (nm) | Thickness after 24 hours (nm) |
|--------|------------------------|-------------------------------|
| Ti-NDC | 112.4                  | 40.6                          |
| Zr-NDC | 125.7                  | 119.3                         |
| Hf-NDC | 98.6                   | 70.2                          |
| Y-NDC  | 107.7                  | 2.1                           |

## 9. Contact angle (CA) measurements

Contact angle measurements were performed using Theta Lite optical tensiometer from Biolin Scientific.

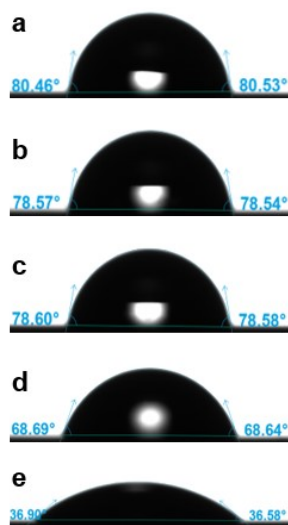

**Fig. S12** Contact angle measurements between DI water and films: **(a)** Ti-NDC film (80°), **(b)** Hf-NDC film (78°), **(c)** Zr-NDC film (78°), **(d)** Y-NDC film (68°), and **(e)** precleaned Si substrate (36°).
